# Supplementary material
Source: PubMed Central journal article supplement (PMC4077381)

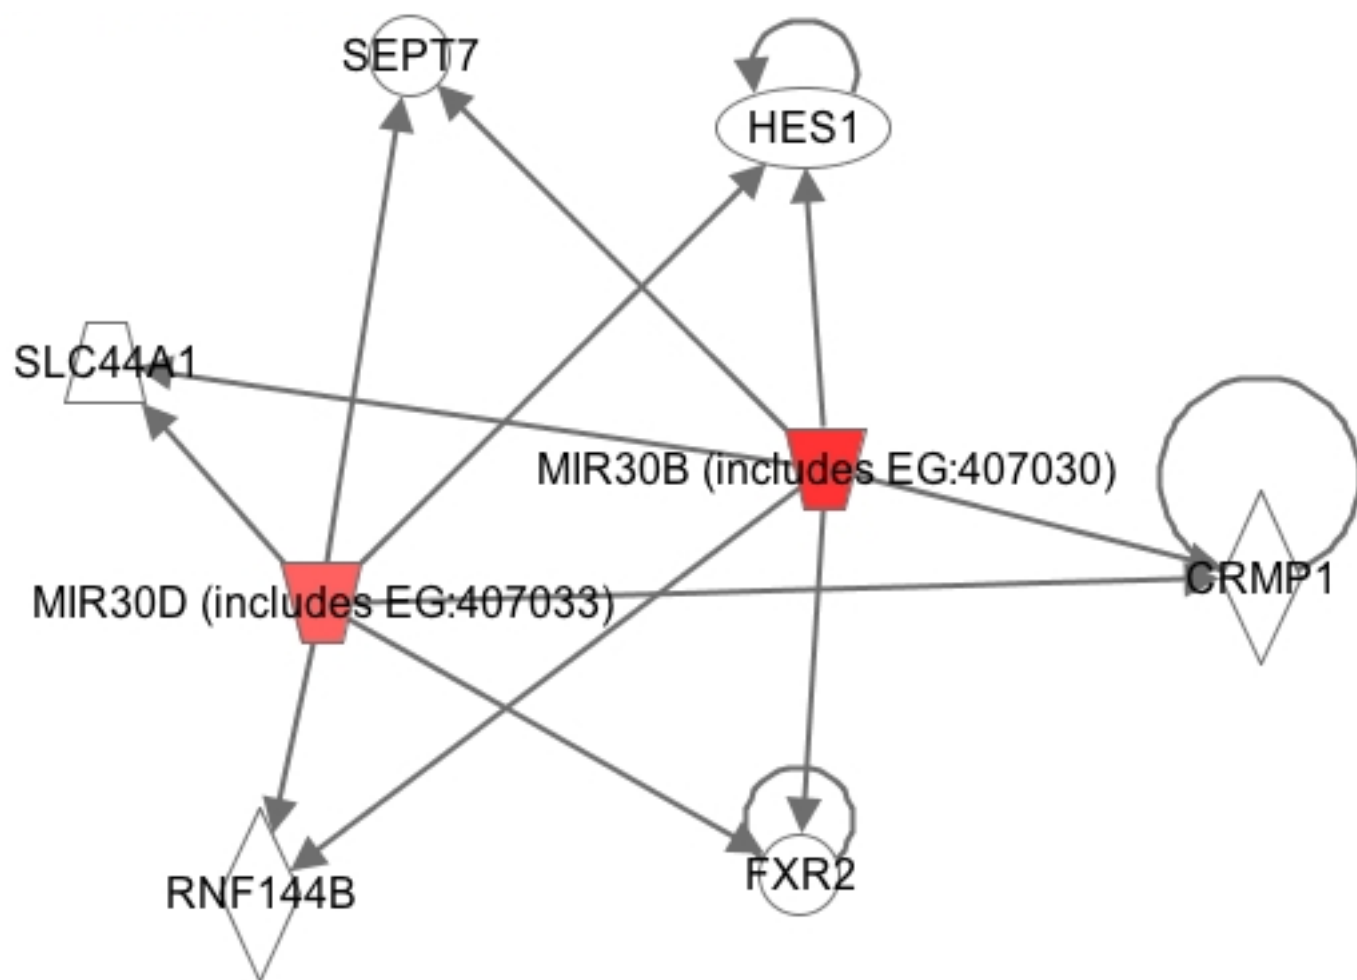

Supplement: SupplFigure1_miRNA_160112.pdf [file SupplFigure1_miRNA_160112.pdf]
